# Tem canto, tem história

## There Is Song, There Is History

ISRAEL MAXAKALI

### DESENHAR, CURAR E TRANSFORMAR COM OS YĀMĪYXOP

*Texto curatorial por Paula Berbert and Roberto Romero*

Quando a ameaça da Covid-19 alcançou os Tikmũ'ũn, em março de 2020, a memória das histórias dos antigos e de como, no passado, eles quase foram dizimados pelas doenças trazidas pelos brancos imediatamente vieram à tona. Habitantes milenares das florestas de Mata Atlântica que cobriam todo o leito dos rios Pardo, Jequitinhonha e Mucuri,<sup>1</sup> os Tikmũ'ũn, mais conhecidos como Maxakali, chegaram a ser contados em apenas 49 pessoas no início da década de 1940.<sup>2</sup> Desse modo, a necessidade de se proteger de uma pandemia não chegou a eles propriamente como uma novidade. Diante dessa urgência, Isael Maxakali — artista, cineasta, professor e uma das mais jovens e proeminentes lideranças de seu povo —, reuniu os homens e mulheres de sua comunidade para iniciar a quarentena. Juntos fixaram uma placa na entrada de Aldeia Verde<sup>3</sup> com os dizeres: “Yāmīyxop yā ka'ok! (Os yāmīyxop são fortes!). Ninguém entra, ninguém sai!” Na ocasião, ele ainda declarou:

Antigamente, os brancos trouxeram doenças para as aldeias dos os Tikmũ'ũn, mas quando os antigos conheceram as doenças, eles fugiram para dentro da mata grande e se esconderam para não adoecerem. Eles se escondiam na mata antigamente. Mas hoje onde iremos nos esconder? Por acaso sobrou alguma mata grande por aqui para nos escondermos? Hoje não temos mais espaço! Não temos mais como nos esconder! Hoje só temos mesmo os nossos yāmīyxop para nos proteger e nos fortalecer e soprar a doença para longe. Todos os yāmīyxop cantam para varrer a doença ruim e impedir que ela chegue nas nossas aldeias. Os nossos pajés são muito fortes, com os nossos yāmīyxop. Os yāmīyxop são fortes de verdade!<sup>4</sup>

CRITICAL TIMES | 4:3 | DECEMBER 2021

DOI 10.1215/26410478-9355321 | Images © 2021 Isael Maxakali

Text © 2021 Paula Berbert and Roberto Romero

*This is an open access article distributed under the terms of a Creative Commons license (CC BY-NC-ND 4.0).*

*Yãmĩyxop* é como os os Tikmũ'ũn nomeiam uma miríade de povos-espíritos da Mata Atlântica que desde tempos imemoriais visitam suas aldeias. Esses seres são multidão e podem se apresentar sob aspectos diversos: minúsculos e invisíveis nos corpos ou cabelos dos Tikmũ'ũn, materializados nos cantos que entoam na *kuxex* (casa dos cantos) ou ainda sob os corpos magníficos, coloridos e mascarados que saem no pátio das aldeias para buscar comida, cantar, dançar e curar. Os *yãmĩyxop* são igualmente o próprio evento de sua visita, os cantos, as danças ou os “rituais,” como também os chamamos. A eles, os Tikmũ'ũn dedicam quase diariamente boa parte do seu tempo, seja preparando o que lhes oferecer de comer e dançando em sua companhia no pátio, como fazem as mulheres, ou recebendo-os na *kuxex*, cantando e caçando com eles, como fazem os homens. Na impossibilidade de se dispersarem pelas florestas como os seus ancestrais fizeram para escapar do contágio das doenças trazidas pelos primeiros colonizadores da região, os *yãmĩyxop*, poderosos xamãs que são, tornaram-se a única força capaz de proteger os Tikmũ'ũn do novo coronavírus.

A crise sanitária instaurada no início de 2020 interrompeu a intensa agenda de projetos artísticos que Isael e sua companheira de vida e trabalho, Sueli Maxakali, preparavam para executar ao longo daquele ano. O imperativo de organizar a quarentena e acompanhar a atuação dos órgãos indigenistas nessa nova situação de emergência tornou-se imediatamente a prioridade do casal. Os meses seguintes foram ainda mais turbulentos para eles e seus parentes, uma vez que a crise da Covid-19 fez sentir de modo ainda mais dramático o desmonte da política pública de saúde indígena e intensificou também os assédios de missionários evangélicos que insistem em tentar doutriná-los. Essa complexa conjuntura decompôs os arranjos políticos internos de Aldeia Verde, ocasionando a saída de um grupo de mais de noventa famílias lideradas pelo casal de artistas e a criação de uma outra comunidade.<sup>5</sup> Para enfrentar essa situação tão adversa, Sueli e Isael decidiram concretizar um sonho antigo: a criação da Aldeia-Escola-Floresta. Trata-se de um projeto sonhado por eles há muito tempo, que visa a organização de encontros periódicos de pajés, a estruturação de oficinas regulares de arte, cinema e agroecologia, com o objetivo da formação de novas lideranças espirituais, de jovens artistas e cineastas, além da recuperação ambiental da região e da retomada da soberania alimentar da comunidade.

Foi nessas circunstâncias que Isael recebeu, com alegria, a indicação para o Prêmio PIPA,<sup>6</sup> uma das mais importantes premiações de arte contemporânea no Brasil. Sua participação no prêmio foi um grande estímulo para que ele fortalecesse uma prática que sempre o acompanhou, a prática do desenho. Ao mesmo tempo em que fortalece a luta junto à sua comunidade para garantir uma terra para o bem-viver, sonhando com a fundação da Aldeia-Escola-Floresta, ele passou a fazer os conjuntos de desenhos que aqui apresentamos, em que os *Yãmĩyxop*

aparecem como impulso fundamental. Produzidas entre outubro de 2020 e março de 2021, estas imagens mostram alguns dos inúmeros seres que desapareceram em suas formas de animais e plantas com a derrubada da Mata Atlântica, mas que permanecem vivos nos corpos dos *yãmĩy*, nos cantos, nos rituais e nos desenhos, tal como nos conta Isael:

Alguns bichos acabaram, só ficou o nome. Mas o nosso canto registra, o nosso canto preserva alguns bichos grandes que não existem mais hoje, os nossos cantos preservam e os desenhos também. Sucuri grande não tem mais, onça grande não tem mais, tamanduá está acabando, jacaré também não tem mais, mas no nosso canto está registrado; o canto e o desenho mostram para as nossas crianças na escola. Por isso que eu falo que alguns bichos acabaram, não existem mais, mas estão aí e não acabam porque nós continuamos cantando e fazendo desenhos para mostrar para as crianças, explicando no desenho dos bichos que antes tinha bichos grandes, mas hoje não tem, só tem o nome, só tem a imagem, só tem o canto.<sup>7</sup>

Curiosa arte do desenho esta que insiste em manter viva na memória e no traço tudo aquilo que os invasores dos seus territórios destruíram. Hoje, as crianças *tikmũ'ũn* só conhecem a sucuri, a onça ou o jacaré através dos cantos, das histórias e dos desenhos. Com “saudades dos bichos” (*xokxop xak*), sempre que visitam as grandes cidades, um dos seus primeiros pedidos é visitar os zoológicos para poderem ver pela primeira vez aqueles seres que só conhecem pelo nome ou pela imagem. Apesar disso, os *Tikmũ'ũn* muitas vezes se recusam a dizer que os bichos “acabaram.” Preferem dizer que eles “foram embora,” depois que os brancos destruíram suas casas, isto é, suas matas. Mas assim como eles partiram, eles podem voltar. Enquanto forem lembrados e imaginados, os bichos e a floresta não terão acabado.

Em dezembro de 2020, Isael recebeu o diagnóstico de covid-19. Após meses lutando no enfrentamento para que a pandemia não atingisse sua comunidade e levasse consigo os mais velhos, ele próprio teve de enfrentar a doença. Assim que foi testado positivo, isolou-se na pequena casa de alvenaria da fazenda para onde haviam se mudado durante a pandemia. Ali, apartado dos seus familiares, sua única companhia eram os lápis-de-cor e os papéis, com os quais começou a desenhar. “Enquanto eu desenhava, eu pensava no canto, eu lembrava. Através dos desenhos, os *yãmĩxop* me curaram.”<sup>8</sup> Imagens que curam, imagens que afetam e transformam . . . O trabalho de Isael Maxakali transborda toda uma outra teoria da imagem, com a qual temos muito o que aprender: seus desenhos não são representação, mas sim transformação. Nas suas palavras: “Se eu fizer um desenho, eu vou formar, transformar, eu vou formar o desenho do bicho, aí fiz, transformou, entenderam?”<sup>9</sup>

**ISABEL MAXAKALI** é cineasta, educador e liderança da Aldeia-Escola-Floresta em Ladainha, Minas Gerais. Seu trabalho no campo do audiovisual é vasto e reconhecido, e tem ampliado suas pesquisas artísticas usando outras linguagens e suportes. Possui graduação no curso de Formação Intercultural de Educadores Indígenas (FIEI) da Universidade Federal de Minas Gerais (UFMG). Integra o coletivo audiovisual Pajé Filmes, desde sua fundação em 2008, e atua como coordenador da escola indígena de sua comunidade. Foi duas vezes professor do Programa de Formação Transversal em Saberes Tradicionais da UFMG, curador da exposição *Mundos Indígenas* (2019, Espaço do Conhecimento da UFMG) e vencedor do Prêmio PIPA Online em 2019.

**PAULA BERBERT** é antropóloga e programadora cultural. Faz doutorado no Programa de Pós-graduação em Antropologia da USP, onde realiza pesquisa sobre arte indígena contemporânea. Atua nos campos da curadoria e mediação intercultural, articulando iniciativas de artistas e cineastas indígenas aos sistemas ocidentais de arte e de cinema. Tem experiência em comunidades pedagógicas formais e não-formais, especialmente nos temas da arte-educação, dos direitos humanos e socioambientais, das questões indígenas e feministas. É mestre em Antropologia (2017, UFMG) e especialista em Estudos e Práticas Curatoriais (2019, FAAP).

**ROBERTO ROMERO** é etnólogo, doutor em Antropologia Social pelo Museu Nacional (UFRJ) e membro do Núcleo de Antropologia Simétrica (NanSi). É membro da Associação Filmes de Quintal e um dos organizadores do *forumdoc.bh* — festival do filme documentário e etnográfico de Belo Horizonte. Foi assistente de direção do longa “Yãmĩyhex: as mulheres-espírito” (Sueli e Isael Maxakali, 2019) e co-diretor do filme “Nũhũ yãgmũ yõg hãm: essa terra é nossa!” (Isael Maxakali, Sueli Maxakali, Carolina Canguçu, Roberto Romero, 2020). Foi assistente de curadoria da exposição *Mundos Indígenas* (Espaço do Conhecimento da UFMG).

#### Notas

1. Esses rios correm nas terras atualmente compreendidas entre o nordeste do estado de Minas Gerais e o extremo sul da Bahia. Importante lembrar que toda a costa brasileira era igualmente coberta por densas florestas de Mata Atlântica.
2. Hoje, são aproximadamente 2.500 pessoas, falantes de um dos últimos idiomas originários daquela região, a língua Maxakali, agrupada junto ao tronco Macro-Jê.
3. Aldeia Verde é um dos quatro territórios que restaram aos Tikmũ'ũn. Trata-se de uma pequena reserva de 500 hectares localizada na zona rural do município de Ladainha, Minas Gerais.
4. Isael Maxakali, mensagem de Whatsapp para os autores em 17 de abril de 2020.
5. Em junho de 2020 passaram a viver numa terra provisoriamente arrendada pela prefeitura local. Com a troca do governo municipal nas últimas eleições, esse acordo de arrendamento não foi renovado, provocando uma segunda mudança da comunidade. Em setembro de 2021, as famílias se mudaram pela terceira vez em pouco mais de um ano e retomaram uma terra no município de Teófilo Otoni (Minas Gerais, Brasil) onde aguardam agora o reconhecimento da área como terra indígena.

6. O Prêmio PIPA possui duas categorias: a primeira se constitui pela escolha de um júri de especialistas, e a segunda, a categoria online, é uma votação aberta para o público. Diante da indicação de Isael ao prêmio em 2020, uma ampla rede de artistas e pensadores indígenas se articulou para angariar votos, dando origem a uma programação de debates intitulada #premiopipaterraindigena. Essa articulação viralizou nas redes sociais e Isael venceu com o maior número de votos da história dessa premiação online. Para mais informações sobre o Prêmio PIPA e sobre a participação de Isael Maxakali em sua 11ª edição ver: [www.pipaprize.com](http://www.pipaprize.com) e [www.instagram.com/isaelmaxakali](http://www.instagram.com/isaelmaxakali).
7. Isael Maxakali, citado na entrevista a Hans Ulrich Obrist, em Obrist, *Entrevistas brasileiras*, vol. 2.
8. Isael Maxakali, em telefonema para os autores no dia 19 de dezembro de 2020.
9. Isael Maxakali, citado no catálogo da exposição *Mundos indígenas*, Ana Maria R. Gomes et al., organizadores, 111.

### Bibliografia

Gomes, Ana Maria R., Deborah Lima, Mariana Oliveira, and Renata Marquez, eds. *Mundos indígenas*. Exhibition Catalogue. Belo Horizonte: Universidade Federal de Minas Gerais, 2020. [www.ufmg.br/espacodoconhecimento/wp-content/uploads/2018/03/ec-ufmg\\_2020\\_mundos-indigenas\\_catologo\\_web.pdf](http://www.ufmg.br/espacodoconhecimento/wp-content/uploads/2018/03/ec-ufmg_2020_mundos-indigenas_catologo_web.pdf).

Obrist, Hans Ulrich. *Entrevistas brasileiras*. Rio de Janeiro: Cobogó, 2021.

## DRAWING, HEALING, AND TRANSFORMATION AMONG THE YĂMĨYXOP

*Curatorial statement by Paula Berbert and Roberto Romero*

*Translated by Ramsey McGlazer*

In March 2020 when word of the threat posed by COVID-19 reached the Tikmũ'ün, memories immediately surfaced. These were memories of old histories and of how, in the past, the ancestors of today's Tikmũ'ün were almost wiped out by the diseases brought by whites. Millennial inhabitants of the Atlantic Forest, which covered the whole length of the Pardo, Jequitinhonha, and Mucuri rivers,<sup>1</sup> the Tikmũ'ün, better known as the Maxakali, numbered only forty-nine persons at the beginning of the 1940s.<sup>2</sup> So the need to protect themselves on their own from a pandemic was not new to them. Faced with this urgent need, Isael Maxakali—an artist, filmmaker, professor, and one of the youngest and most prominent leaders of his people—brought together the men and women in his community to begin the quarantine. Together, they attached a plaque to the entrance to the village of Aldeia Verde<sup>3</sup> with the words: “Yămĩyxop yă ka'ok! (Os yămĩyxop são fortes!) Ninguém entra, ninguém sai!” (The Yămĩyxop are strong! No one enters, no one leaves!). On this occasion, Isael also declared:

In the past, the whites brought diseases to the villages of the Tikmũ'ũn, but when our ancestors learned about these diseases they fled into the great forests and hid themselves so that they would not fall ill. In the past, they hid themselves in the forest. But today where will we go to hide? Is there any great forest left in which we could hide? Today we have no more space! We have no way to hide! Today we only have *yãmĩyxop* to protect and strengthen us and blow this disease away. All the *yãmĩyxop* sing to sweep the terrible disease away and prevent it from reaching our villages. Our shamans are very strong, together with the *yãmĩyxop*. The *yãmĩyxop* are really strong!<sup>4</sup>

*Yãmĩyxop* is the Tikmũ'ũn name for a myriad of peoples-spirits of the Atlantic Forest who since time immemorial have visited their villages. These beings are legion, and they can appear in various forms: in the bodies or hair of the Tikmũ'ũn; manifest in the songs that are intoned in the *kuxex*, or house of songs; or even in the magnificent painted and masked bodies that enter village courtyards in search of food, or to sing, dance, and heal. *Yãmĩyxop* also refers to a visit from one of these beings and to a range of songs, dances, and what we call “rituals.” The Tikmũ'ũn dedicate much of their time to the *yãmĩyxop* almost every day, whether by preparing offerings in the form of food or by dancing together with them in the courtyard, as do the women, or by receiving them in the *kuxex* or singing and hunting with them, as do the men. Given that it is impossible for today's Tikmũ'ũn to seek refuge in the forests as their ancestors did in order to escape infection by the diseases brought by the first colonizers in the region, the *yãmĩyxop*, who are powerful shamans, became the only force capable of protecting the Tikmũ'ũn from the novel coronavirus.

The public health crisis introduced in early 2020 interrupted a set of intense artistic projects that Isael and Sueli Maxakali, his partner in life and work, had been preparing to undertake throughout that year. The effort to organize the quarantine and to take part in the efforts led by Indigenous organizations in this new emergency situation immediately became the couple's priority. The following months were even more turbulent for them and their families after the crisis made the dismantling of Indigenous public health systems even more dramatically palpable and intensified harassment from evangelical missionaries seeking to indoctrinate Indigenous people. This complex conjuncture led to the breakdown of internal political arrangements in the village of Aldeia Verde, prompting ninety families, led by Isael and Sueli, to leave and create another community.<sup>5</sup> In an effort to confront this dire situation, Sueli and Isael decided to make an old dream of theirs into a reality, creating the Village-Forest-School. This is a project that they have dreamed of for a long time, one that seeks to organize regular meetings among shamans; to host regular workshops on art, film, and agro-ecology with the aim of educating new spiritual leaders and young artists and filmmakers; to work toward

the environmental regeneration of the region; and to reclaim food sovereignty for the community.

These were the circumstances in which Isael delightedly received a nomination for the PIPA Prize, one of the most important contemporary art prizes in Brazil.<sup>6</sup> His participation in the selection process led him to strengthen a practice that has always been with him: the practice of drawing. While he was strengthening his commitment to struggling together with his community to secure land for the community's well-being, and while he was also dreaming of founding the Village-Forest-School, Isael made the set of drawings that we present here. In these drawings, the *yãmĩxop* appear as a driving force; their impulse animates Isael's work. Produced between October 2020 and March 2021, these images show some of the countless beings that are disappearing in their animal and plant forms as the Atlantic Forest is demolished, but that remain alive in the bodies of the *yãmĩy*, in songs, in rituals, and in drawings, as Isael recounts:

Some animals are gone; only their names are left. But our singing records, our singing preserves, some of the large animals. Our songs preserve them, and so do the drawings. The giant anaconda is gone, the jaguar is gone, the anteater is disappearing, and the alligator is gone but recorded in our singing. The songs and the drawings show this to the children in school. This is why I say that some animals have disappeared and no longer exist, but that they are here and have not disappeared, because we keep singing and making drawings to show the children. The drawings of the animals illustrate that there used to be large animals, but today there are not. There are only names, there are only images, and there is only song.<sup>7</sup>

This is a striking practice of drawing, one that insistently keeps alive the memory and the trace of all that the invaders of these lands have destroyed. Today Tikmũ'ün children only know about the anaconda and the jaguar and alligator through songs, stories, and drawings. With their "nostalgia for animals" [*saudade dos bichos, xokxop xak*], they ask right away, whenever they visit big cities, to visit the zoos so that, for the first time, they can see the beings that they have only heard the names of or seen in images. Despite this, the Tikmũ'ün often refuse to say that animals "have disappeared." They prefer to say that they "went away" after the whites destroyed their homes—that is, their forests. But just as they went away, they can return. As long as they are remembered and imagined, the animals and the forest will not have disappeared.

In December 2020, Isael received a diagnosis of COVID-19. After months of struggling to prevent the pandemic from reaching his community and claiming the lives of its oldest members, he himself had to confront the disease. Once he



tested positive, he isolated in the small brick farmhouse that he had moved into during the pandemic. Here, separated from his family, he only had colored pencils and paper for company, and with these he began to draw. “While I drew, I thought of songs, I remembered. Through the drawings, the *yāmiyxop* healed me.”<sup>8</sup> Images that heal, images that affect and transform: the work of Isael Maxakali overflows, offering a whole other theory of the image, from which we have much to learn. His drawings are not representation but transformation. In his words: “If I make a drawing, I form, transform. I form the drawing of the animal, and I’ve done it, it’s transformed, understand?”<sup>9</sup>

---

**ISAEAL MAXAKALI** is an artist, filmmaker, educator, and leader of the Aldeia-Escola-Floresta (Village-Forest-School) in Ladainha, Minas Gerais, Brazil. His work in the audiovisual arts is wide ranging and widely recognized, and he has recently broadened his artistic investigations by using new languages and materials. He has a degree from the Program for the Intercultural Training of Indigenous Educators at the Universidade Federal de Minas Gerais (UFMG). He has been part of the audiovisual collective Pajé Filmes since its founding in 2008, and he acts as the coordinator of an Indigenous school in his community. He has twice been a professor in the UFMG’s Program for Transversal Training in Traditional Knowledges and curated the exhibition *Mundos Indígenas* (*Indigenous Worlds*) at the UFMG in 2019. In 2019, he won the PIPA Prize.

**PAULA BERBERT** is an anthropologist and cultural programmer. She has a doctorate in anthropology from the Universidade de São Paulo, where she completed research on contemporary Indigenous art. She works as a curator and is active in the field of intercultural mediation, organizing initiatives that bring Indigenous artists and filmmakers into contact with Western systems for the exhibition of art and film. She has experience in community pedagogy and in human and environmental rights, as well as in Indigenous and feminist struggles. She has a master’s degree in anthropology from the Universidade Federal de Minas Gerais and a degree in curatorial studies and practices from the Fundação Armando Alvares Penteado (2019).

**ROBERTO ROMERO** is an ethnographer with a PhD in social anthropology from the Museu Nacional at the Universidade Federal do Rio de Janeiro. He is a member of the research project Núcleo de Antropologia Simétrica and of the Associação Filmes de Quintal and one of the organizers of forumdoc.bh, a documentary and ethnographic film festival in Belo Horizonte. He was assistant director of the feature film *Yāmīyhex: As mulheres-espírito* (*Yāmīyhex: The Women-Spirit*, directed by Sueli and Isael Maxakali, 2019) and codirector of the film *Nūhū yāgmū yōg hām: Essa terra é nossa!* (*Nūhū yāgmū yōg hām: This Land is Ours!*, with Sueli and Isael Maxakali and Carolina Canguçu, 2020). He was an assistant curator of the exhibition *Mundos indígenas* (*Indigenous Worlds*) at the Universidade Federal de Minas Gerais.



## Notes

1. These rivers run through the lands that today extend from the northeast of the state of Minas Gerais to the southernmost part of Bahia. It is important to remember that the entirety of what is now the Brazilian coast was made up of similarly dense forests, all part of the Atlantic Forest. [Much of the Atlantic Forest has been lost to deforestation. — Trans.]
2. Today there are approximately 2,500 Tikmũ'ün, who are speakers of one of the last languages native to the region, the Maxakali language, part of the Macro-Jê language family.
3. Aldeia Verde is one of four territories left to the Tikmũ'ün. It is a small reservation of five hundred hectares located in a rural region in the municipality of Ladainha, in the state of Minas Gerais.
4. Isael Maxakali, Whatsapp message to authors, April 17, 2020.
5. In June 2020, they started to live on land provisionally leased by the local city hall. With the change of the municipal government in the last elections, this lease agreement was not renewed, causing a second change in the community. In September 2021, the families moved for the third time in just over a year and repossessed land in the municipality of Teófilo Otoni (Minas Gerais, Brazil) where they are now awaiting recognition of the area as an indigenous land.
6. The PIPA Prize has two categories: the first is decided by a jury of specialists, and the second, online category is decided through an open public vote. After Isael's nomination for the prize in 2020, a broad network of Indigenous artists and thinkers came together to solicit votes, giving rise to a series of conversations that took place under the rubric of #premiopipaterraindigena. This effort went viral on social media, and Isael won the prize with the most votes in the history of the online category. For more information on the PIPA Prize, see PIPA Prize (website), PIPA Institute, [www.pipaprize.com](http://www.pipaprize.com) (accessed May 10, 2021). For information on Isael Maxakali's participation in the prize's eleventh season, see isaelmaxakali, Instagram feed, [www.instagram.com/isaelmaxakali](https://www.instagram.com/isaelmaxakali) (accessed May 10, 2021).
7. Isael Maxakali, quoted in Obrist, *Entrevistas brasileiras*, vol. 2.
8. Isael Maxakali, phone call to authors, December 19, 2020.
9. Isael Maxakali, quoted in Gomes et al., *Mundos indígenas*, 111.

## Works Cited

- Gomes, Ana Maria R., Deborah Lima, Mariana Oliveira, and Renata Marquez, eds. *Mundos indígenas*. Exhibition Catalogue. Belo Horizonte: Universidade Federal de Minas Gerais, 2020. [www.ufmg.br/espacodoconhecimento/wp-content/uploads/2018/03/ec-ufmg\\_2020\\_mundos-indigenas\\_catalogo\\_web.pdf](http://www.ufmg.br/espacodoconhecimento/wp-content/uploads/2018/03/ec-ufmg_2020_mundos-indigenas_catalogo_web.pdf).
- Obrist, Hans Ulrich. *Entrevistas brasileiras*. Rio de Janeiro: Cobogó, 2021.

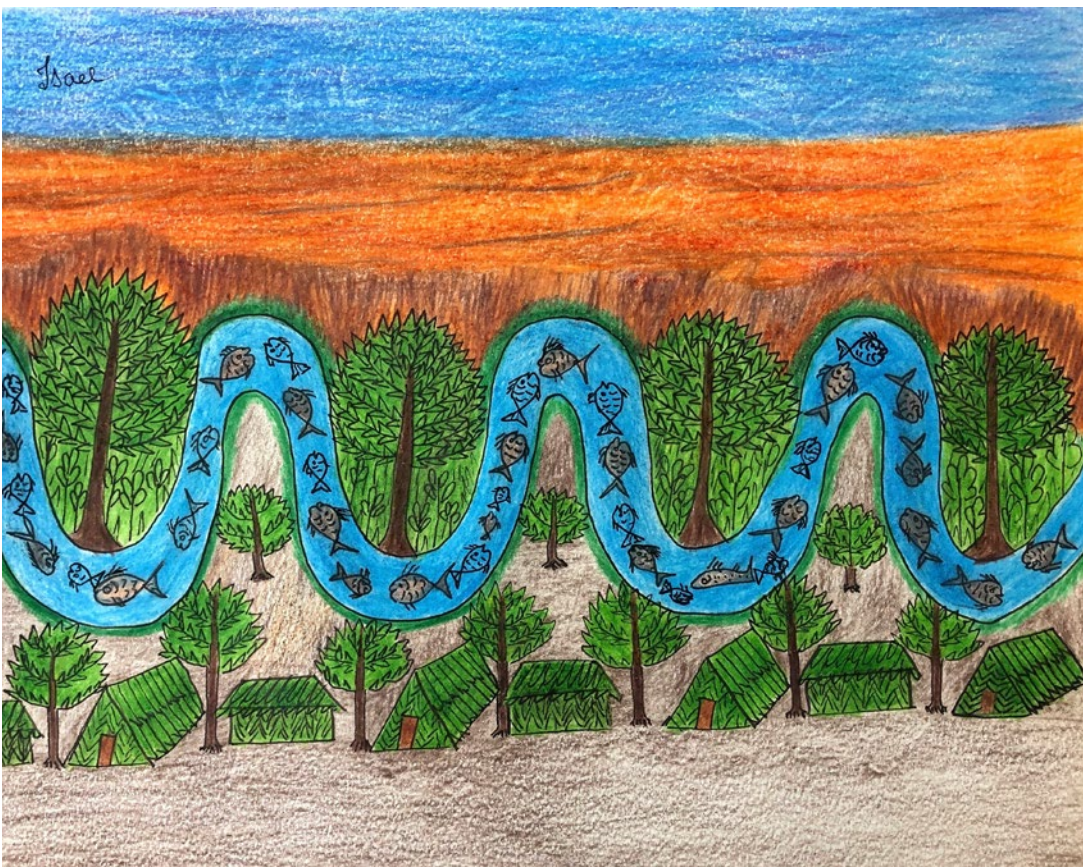

FIGURA/FIGURE 1. *Mātānāg xop pet (Houses of the Mātānāg People)* (2020). Lápis de cor sobre papel (colored pencil on paper), 21×29.7 cm. Obra do acervo do Prêmio PIPA (Prêmio PIPA Collection).

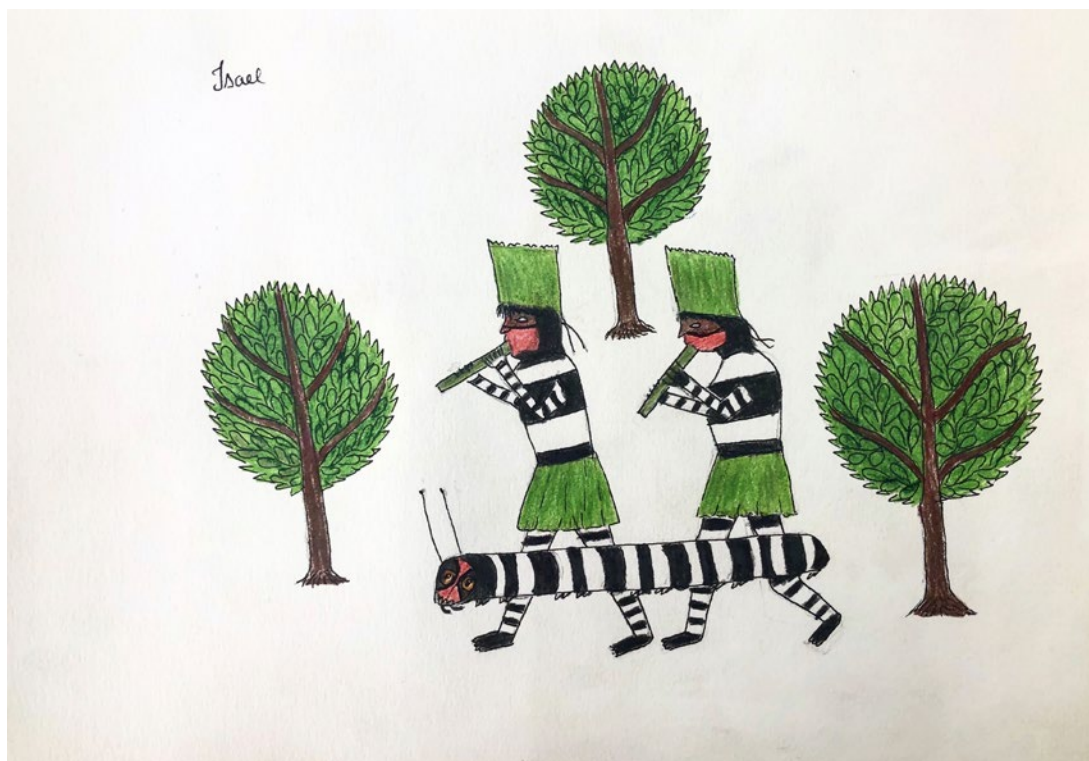

FIGURA/FIGURE 2. *Tatakox (Caterpillar-Spirit)* (2020). Lápis de cor sobre papel (colored pencil on paper), 21×29.7 cm. Obra do acervo do Prêmio PIPA (Prêmio PIPA Collection).

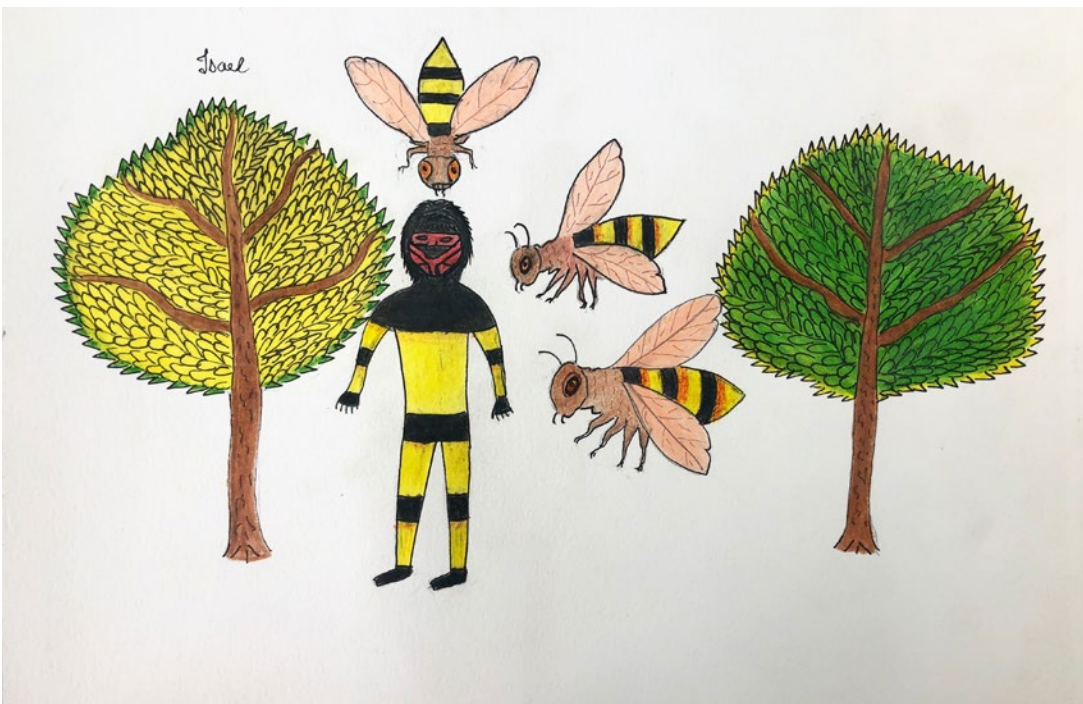

FIGURA/FIGURE 3. *Pukutok (Child of the Bee)* (2020). Lápis de cor sobre papel (colored pencil on paper), 21 × 29.7 cm. Obra do acervo do Prêmio PIPA (Prêmio PIPA Collection).



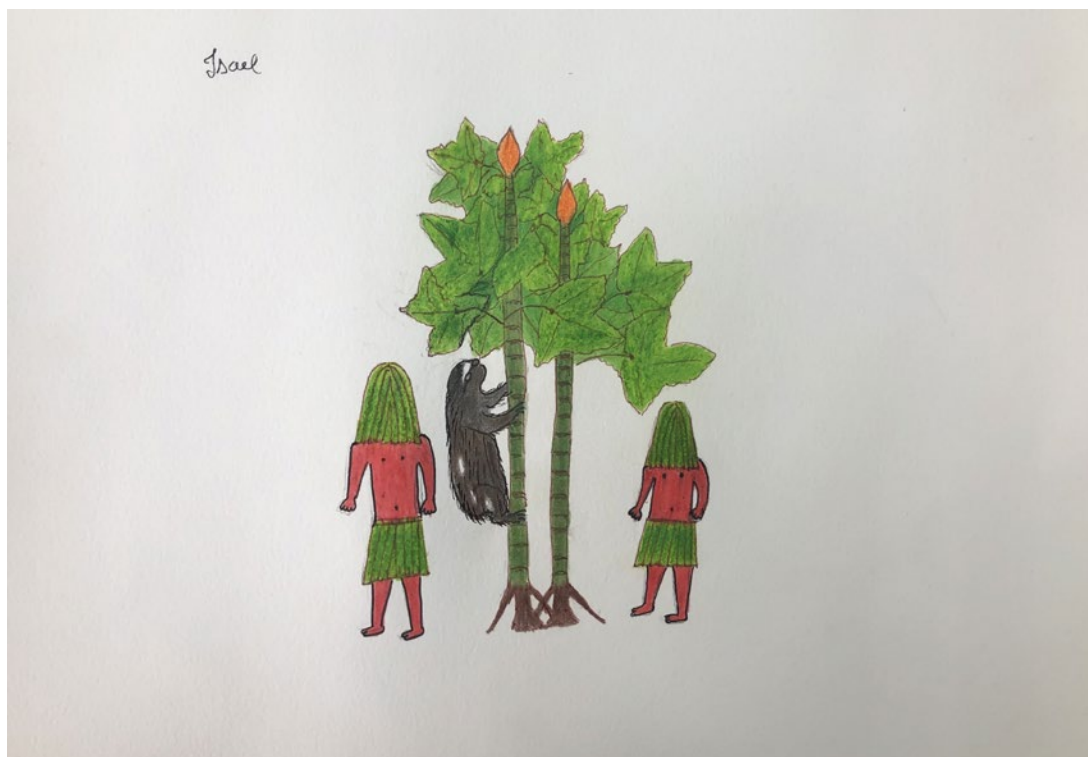

FIGURA/FIGURE 4. *Xũ'ũy (Sloth-Animal)* (2020). Lápis de cor sobre papel (colored pencil on paper), 21×29.7 cm. Obra do acervo do Prêmio PIPA (Prêmio PIPA Collection).

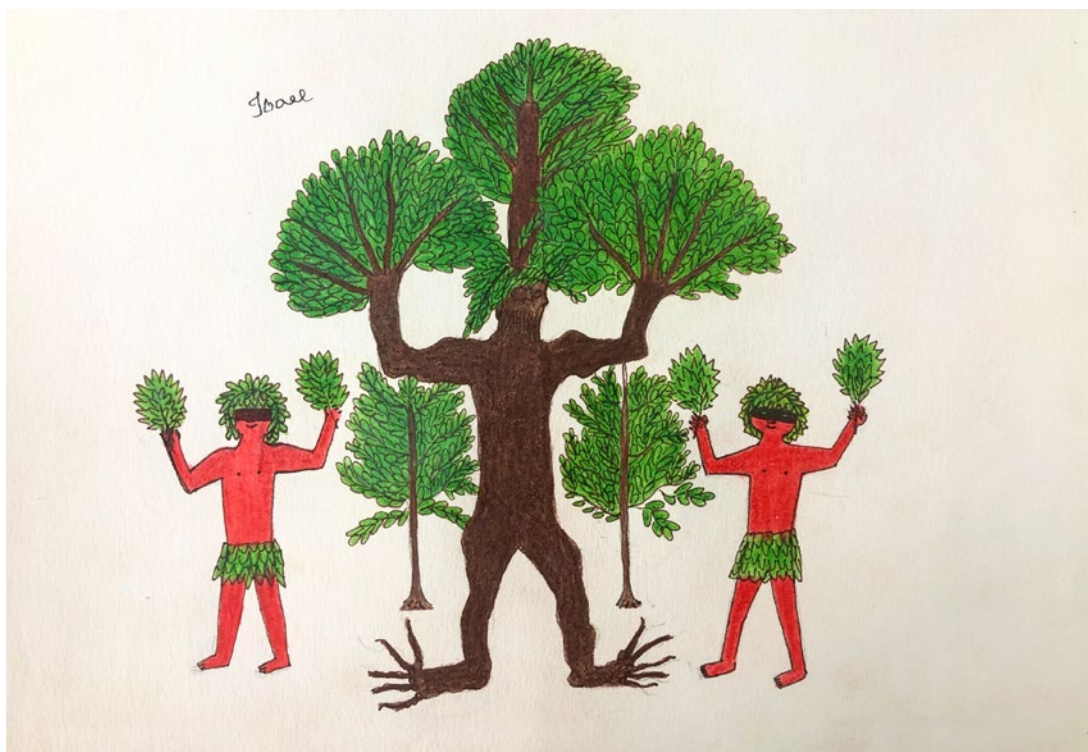

FIGURA/FIGURE 5. *Kukmax (Red-Footed Tortoise)* (2020). Lápis de cor sobre papel (colored pencil on paper), 21 × 29.7 cm. Obra do acervo do Prêmio PIPA (Prêmio PIPA Collection).



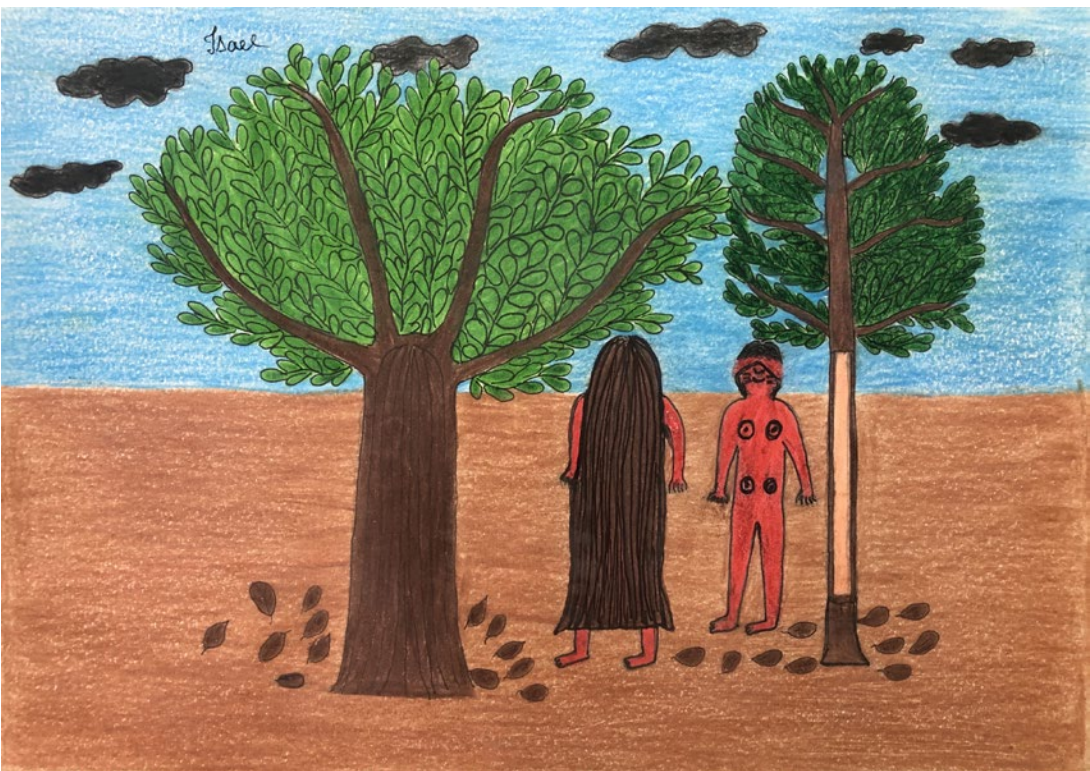

FIGURA/FIGURE 6. *Yāmīy Mōka'ok (Yāmīy Passage)* (2020). Lápis de cor sobre papel (colored pencil on paper), 21 × 29.7 cm. Obra de acervo particular (private collection).

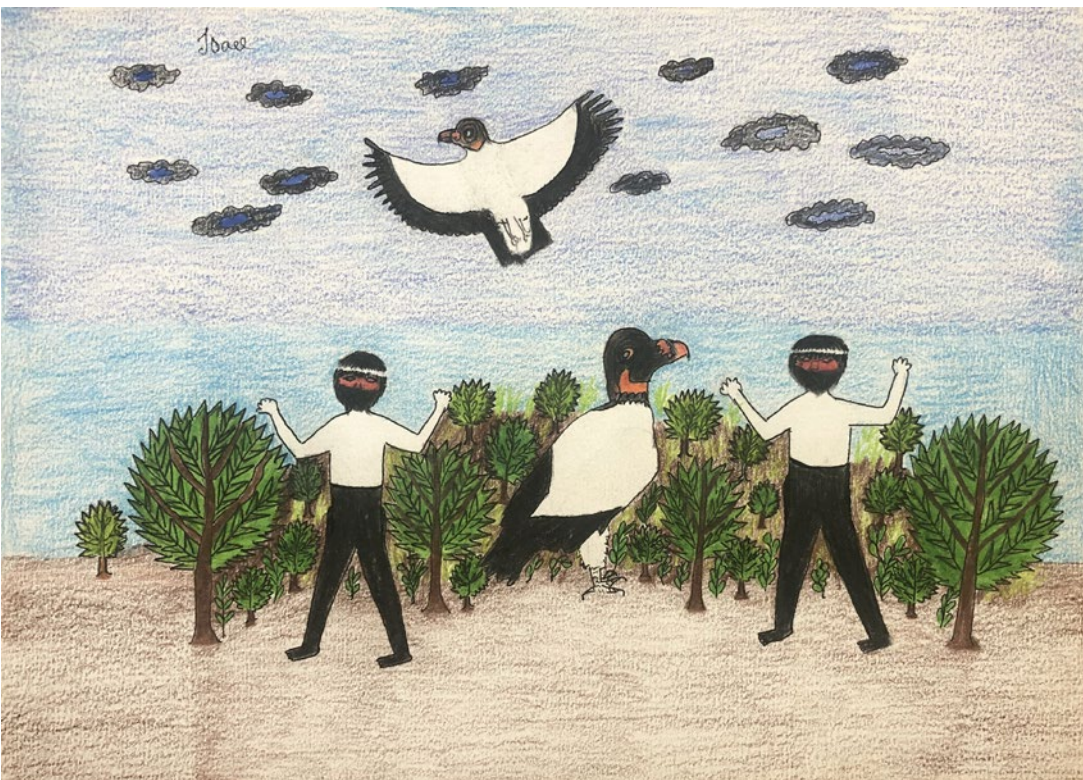

FIGURA/FIGURE 7. *Xakuxux (Vulture-King)* (2020). Lápis de cor sobre papel (colored pencil on paper), 21×29.7 cm. Obra do acervo da Galeria Jaider Esbell de Arte Indígena Contemporânea (from the collection of the Galeria Jaider Esbell de Arte Indígena Contemporânea).



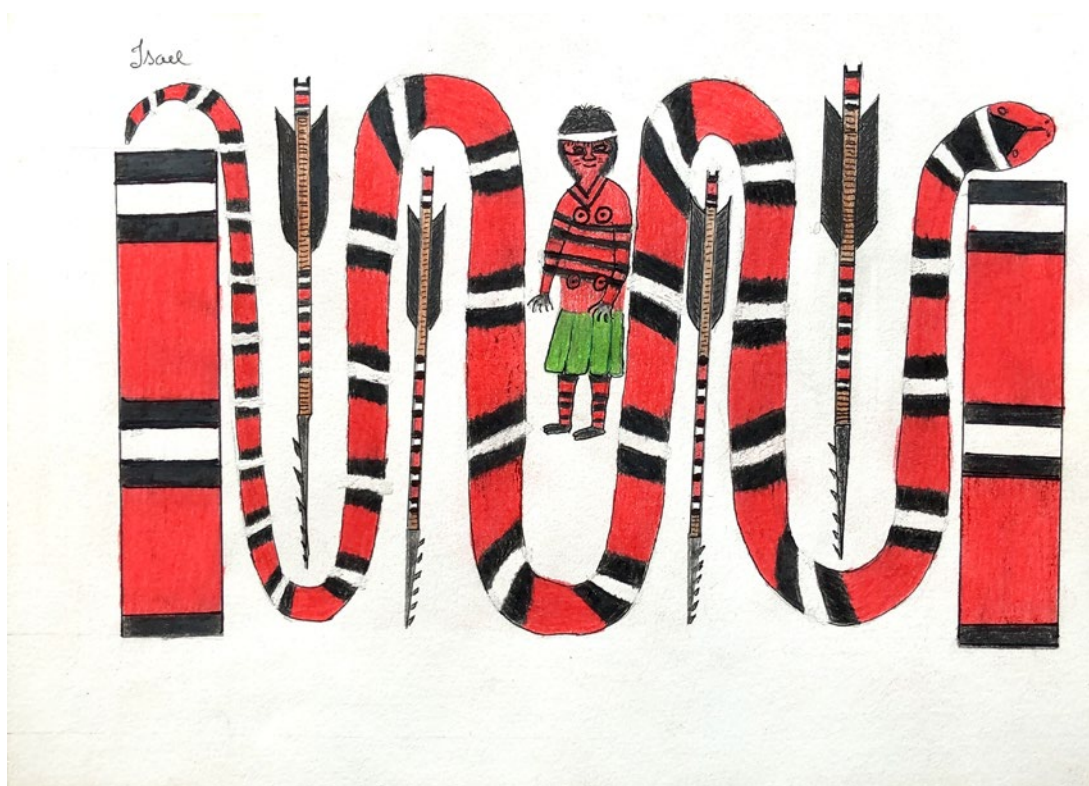

FIGURA/FIGURE 8. *Kopkuphi yōg kāyā* (*The Snake of Kopkuphi [Manioc-Spirit]*) (2020). Lápis de cor sobre papel (colored pencil on paper), 21×29.7 cm. Obra de acervo particular (private collection).

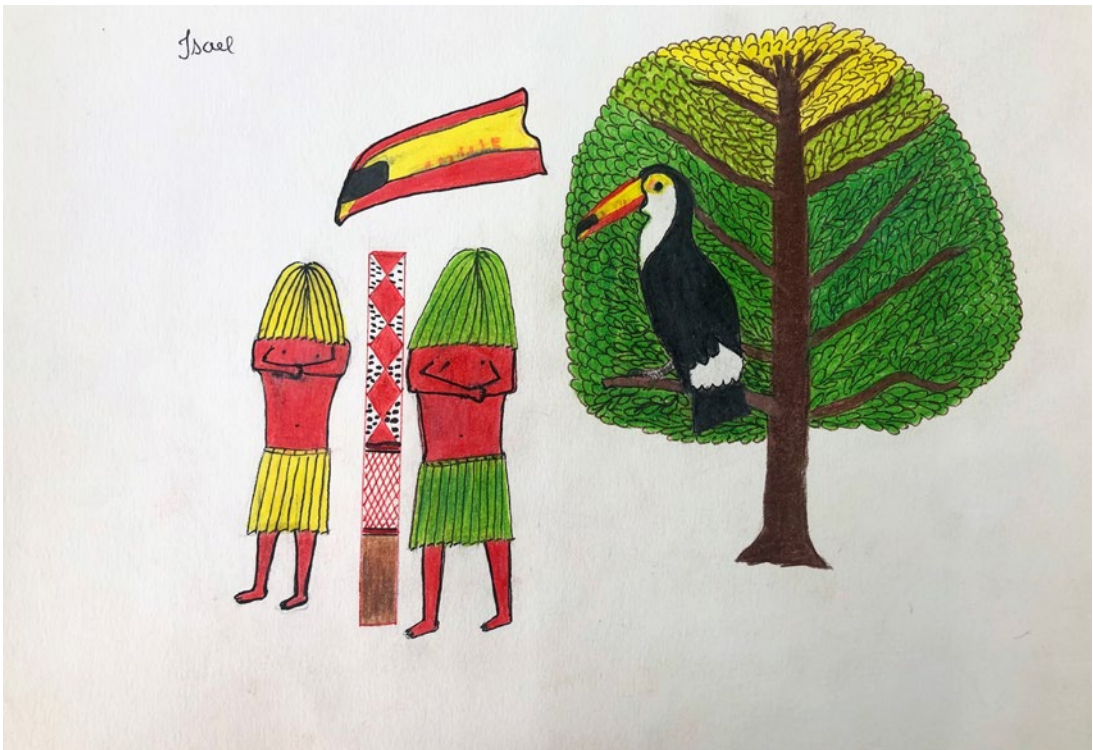

FIGURA/FIGURE 9. *Kepmîy (Pin-Tailed Manakin-Spirit)* (2020). Lápis de cor sobre papel (colored pencil on paper), 21×29.7 cm. Obra de acervo particular (private collection).

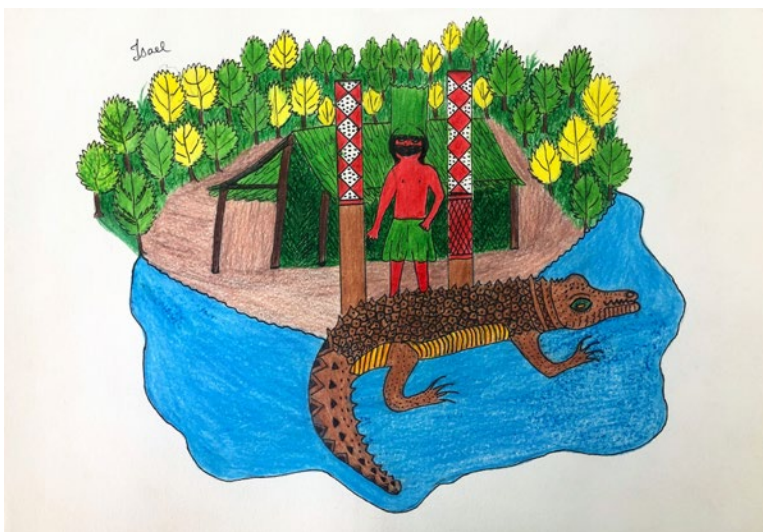

FIGURA/FIGURE 10. *Mããy Kupnãg (Jacarezinho)* (2020). Lápis de cor sobre papel (colored pencil on paper), 21×29.7 cm. Obra de acervo particular (private collection).

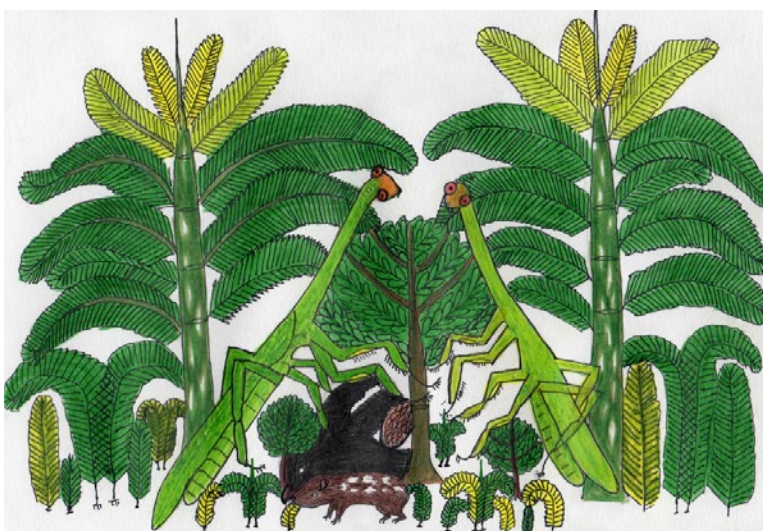

FIGURA/FIGURE 11. *Kaxõy yõg hãm ãgtux (Story of the Praying Mantis)* (2021). Lápis de cor sobre papel (colored pencil on paper), 21×29.7 cm. Obra de acervo particular (private collection).



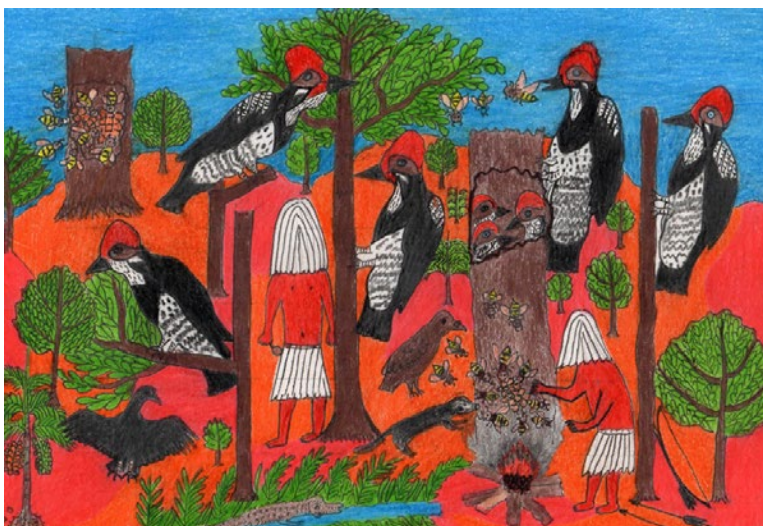

FIGURA/FIGURE 12. *Mānmān Kutex (Song of the Woodpecker)* (2021). Lápis de cor sobre papel (colored pencil on paper), 21×29.7 cm. Obra de acervo particular (private collection).

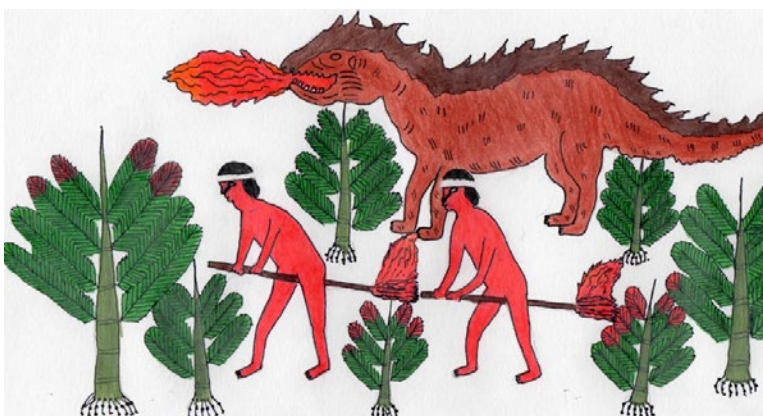

FIGURA/FIGURE 13. *Īta yōg hām āgtux (Story of the Dragon)* (2021). Lápis de cor sobre papel (colored pencil on paper), 21×29.7 cm. Obra de acervo particular (private collection).



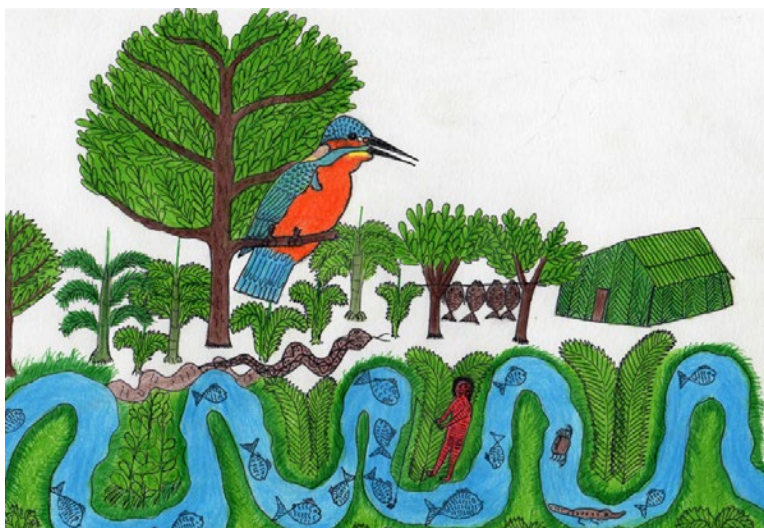

FIGURA/FIGURE 14. *Māmxexex yōg kutex (Song of the Kingfisher)* (2021). Lápis de cor sobre papel (colored pencil on paper), 21×29.7 cm. Obra de acervo particular (private collection).

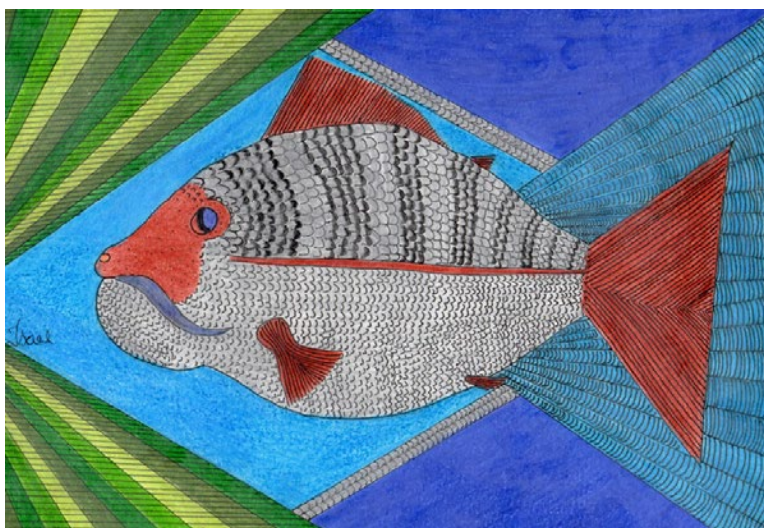

FIGURA/FIGURE 15. *Māmxeka yōg hām āgtux (Story of the Big Fish)* (2021). Lápis de cor sobre papel (colored pencil on paper), 21×29.7 cm. Obra de acervo particular (private collection).

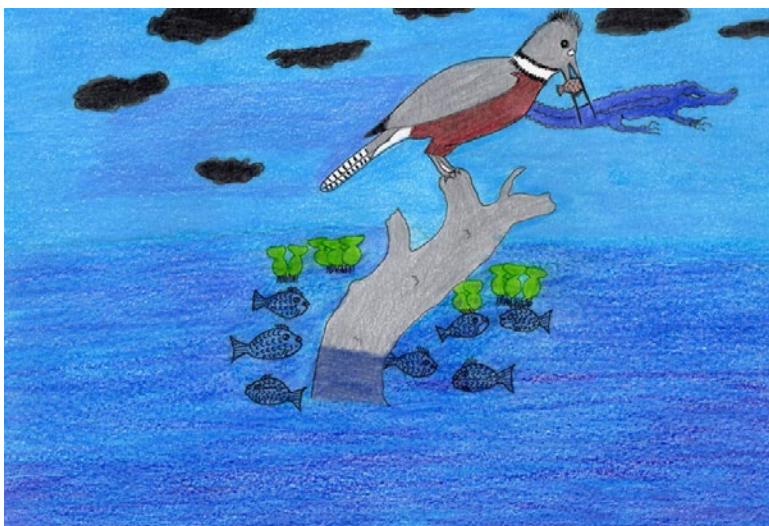

FIGURA/FIGURE 16. *Māmxexex yōg kutex xi hām āgtux (Story of the Kingfisher's Song)* (2021). Lápis de cor sobre papel (colored pencil on paper), 21×29.7 cm. Obra de acervo particular (private collection).

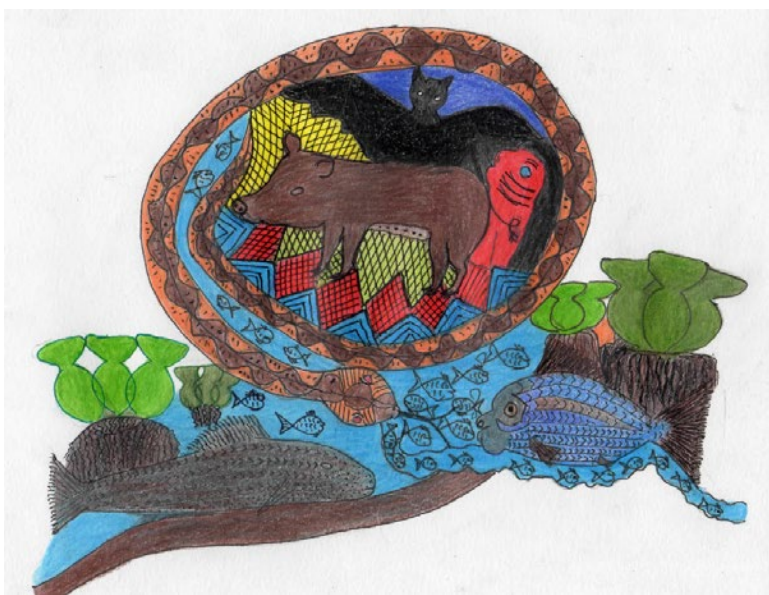

FIGURA/FIGURE 17. *Xūnīm yōg kutex (Song of the Bat)* (2021). Lápis de cor sobre papel (colored pencil on paper), 21×29.7 cm. Obra de acervo particular (private collection).
